# Supplementary material for: Catalytic oxidation of methyl bromide using ruthenium-based catalysts
Source: Royal Society of Chemistry journal article supplement (doi:10.1039/c5cy01900a), 2016-01-01
Supplement: c5cy01900a1.pdf [file c5cy01900a1.pdf]

## Supporting Information

### Catalytic oxidation of methyl bromide using ruthenium-based catalysts

Xiaolong Liu<sup>a</sup>, Junlin Zeng<sup>a,b</sup>, Jian Wang<sup>a,c</sup>, Wenbo Shi<sup>a,d</sup>, Tingyu Zhu<sup>a,\*</sup>

<sup>a</sup>Beijing Engineering Research Center of Process Pollution Control, National Engineering Laboratory for Hydrometallurgical Cleaner Production Technology, Institute of Process Engineering, Chinese Academy of Sciences, Beijing 100190, China

<sup>b</sup>Chemistry and Chemical Engineering, Guizhou University, Guiyang, Guizhou 550025, China

<sup>c</sup>Graduate University of Chinese Academy of Sciences, Beijing 100049, China

<sup>d</sup>Institute of Chemical Engineering, China University of Petroleum, Beijing, 102249, China

(\*) Corresponding author. Tel./Fax: +86-10-82544821.

E-mail address: [tyzhu@ipe.ac.cn](mailto:tyzhu@ipe.ac.cn)

#### Contents

1. The XPS data of the Ru-based catalysts
2. The catalytic evaluation platform
3. The multi-pollutants test without methyl acetate
4. The inlet and outlet concentration of CO within the temperature range of 200-240 °C

**Table S1.** The XPS data of the fresh and used Ru/TiO<sub>2</sub> catalysts

| Catalyst                  | Ru <sub>cus</sub><br>(at.%) | Ru <sub>cus+O<sub>ot</sub></sub><br>(at.%) | Ru <sup>4+</sup> <sub>satellite</sub><br>(at.%) | Ru/Ti |
|---------------------------|-----------------------------|--------------------------------------------|-------------------------------------------------|-------|
| Fresh Ru/TiO <sub>2</sub> | 59.6                        | 23.5                                       | 16.9                                            | 0.022 |
| Used Ru/TiO <sub>2</sub>  | 52.8                        | 27.1                                       | 20.1                                            | 0.013 |

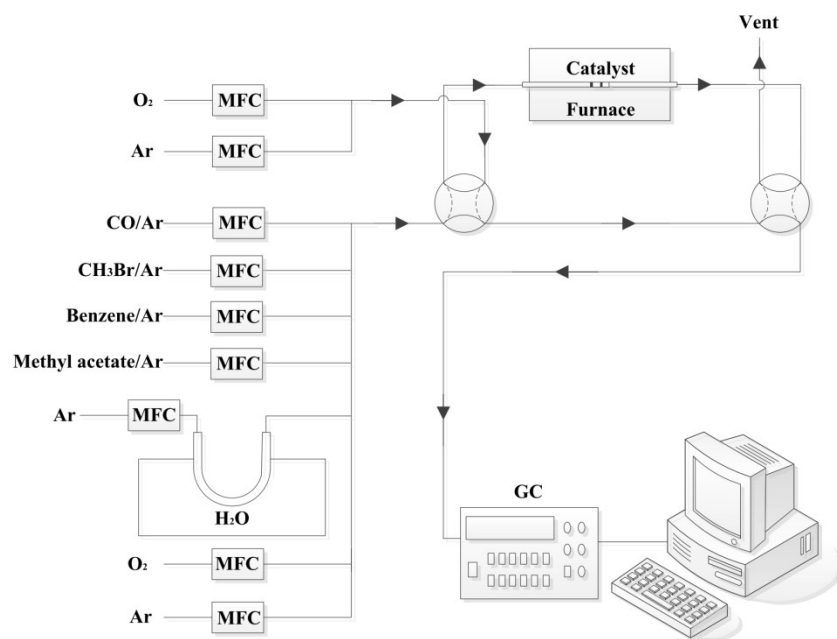

**Fig. S1** The catalytic evaluation platform

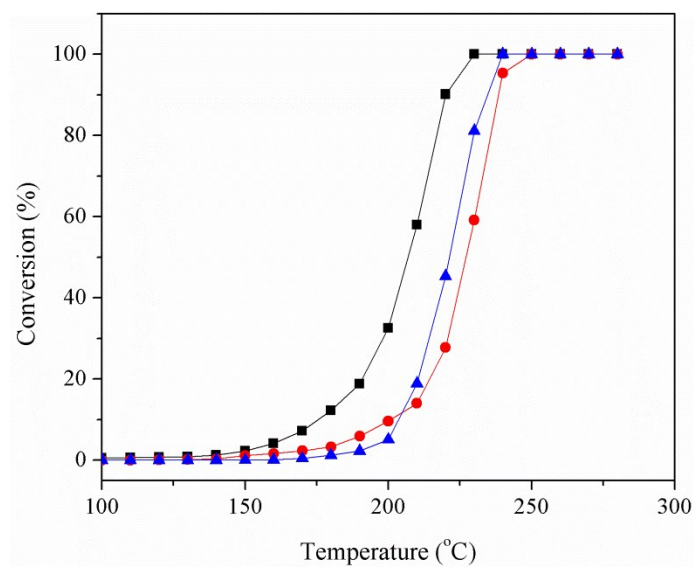

**Fig. S2** The multi-pollutants test without methyl acetate: CO (■), CH<sub>3</sub>Br (●), benzene (▲) conversions as a function of reaction temperature over Ru/TiO<sub>2</sub> under the conditions of pollutants concentrations = 3500 ppm, 100 ppm, and 200 ppm, respectively, O<sub>2</sub> concentration = 20 vol%, and WHSV =60,000 mL/(g h).

**Table S2.** The outlet concentration of CO within the temperature range of 200-240 °C

| Temperature<br>(°C) | Inlet concentration<br>(ppm) | Outlet concentration<br>(ppm) |
|---------------------|------------------------------|-------------------------------|
| 200                 | 3500                         | 3572                          |
| 210                 | 3500                         | 3565                          |
| 220                 | 3500                         | 3664                          |
| 230                 | 3500                         | 3625                          |
| 240                 | 3500                         | 3540                          |
